# Supplementary material for: Development and External Validation of a Radiomics Model Derived from Preoperative Gadoxetic Acid-Enhanced MRI for Predicting Histopathologic Grade of Hepatocellular Carcinoma
Source: MDPI journal article supplement (doi:10.3390/diagnostics13030413), 2023-01-23
Supplement: s1 [file s1]

## Supplementary materials

Development and External Validation of a Radiomics Model Derived from Preoperative Gadoteric Acid-Enhanced MRI for Predicting Histopathologic Grade of Hepatocellular Carcinoma

**Table S1. Gadoteric acid-enhanced MRI scanning protocol at two participating centers**

Table S1A. Gadoteric acid-enhanced MRI scanning parameters in the development cohort

| Phase               | Repetition time (ms) | Echo time (ms) | Field of view (mm×mm) | Flip angle (degree) | Slice thickness (mm) |
|---------------------|----------------------|----------------|-----------------------|---------------------|----------------------|
| Arterial phase      | 3.7                  | 1.31           | 330×241               | 10                  | 2.5                  |
| Portal vein phase   | 3.2                  | 1.13           | 240×330               | 10                  | 2.5                  |
| Delayed phase       | 3.2                  | 1.13           | 240×330               | 10                  | 2.5                  |
| Hepatobiliary phase | 3.2                  | 1.13           | 240×330               | 10                  | 3.5                  |

Table S1B. Gadoteric acid-enhanced MRI scanning parameters in the test cohort

| Phases              | Repetition time (ms) | Echo time (ms) | Field of view (mm×mm ) | Flip angle (degree) | Slice thickness (mm) |
|---------------------|----------------------|----------------|------------------------|---------------------|----------------------|
| Arterial phase      | 3.42                 | 1.25           | 400×400                | 13                  | 2.5                  |
| Portal vein phase   | 3.42                 | 1.25           | 400×400                | 13                  | 2.5                  |
| Delayed phase       | 3.42                 | 1.25           | 400×400                | 13                  | 2.5                  |
| Hepatobiliary phase | 3.42                 | 1.25           | 400×400                | 30                  | 2.5                  |

**Table S2. Radiomics features included in the three radiomics models**

Logistic regression model (22):

| <b>Radiomics features</b>                     |
|-----------------------------------------------|
| original_firstorder_Energy                    |
| original_firstorder_Mean                      |
| original_glszm_SmallAreaHighGrayLevelEmphasis |
| original_gldm_GrayLevelNonUniformity          |
| original_glcm_JointEnergy                     |
| wavelet-HLL_firstorder_Kurtosis               |
| wavelet-HLL_glrlm_GrayLevelVariance           |
| wavelet-HLH_glcm_ClusterTendency              |
| wavelet-HLH_glcm_Correlation                  |
| wavelet-HLH_glcm_DifferenceVariance           |
| wavelet-HLH_glcm_MaximumProbability           |
| wavelet-HLH_glcm_SumEntropy                   |
| wavelet-HHL_firstorder_Mean                   |
| wavelet-HHL_glcm_Correlation                  |
| wavelet-HHL_glcm_JointEnergy                  |
| wavelet-HHL_glrlm_GrayLevelVariance           |
| wavelet-HHH_glcm_Correlation                  |
| wavelet-HHH_glcm_MaximumProbability           |
| wavelet-LLL_firstorder_Maximum                |
| wavelet-LLL_firstorder_Minimum                |
| wavelet-LLL_gldm_HighGrayLevelEmphasis        |
| wavelet-LLL_glcm_DifferenceVariance           |

Support vector machine (22):

| <b>Radiomics features</b>                     |
|-----------------------------------------------|
| original_firstorder_Energy                    |
| original_firstorder_Mean                      |
| original_glszm_SmallAreaHighGrayLevelEmphasis |
| original_gldm_GrayLevelNonUniformity          |
| original_glcm_JointEnergy                     |
| wavelet-HLL_firstorder_Kurtosis               |
| wavelet-HLL_glrlm_GrayLevelVariance           |
| wavelet-HLH_glcm_ClusterTendency              |
| wavelet-HLH_glcm_Correlation                  |
| wavelet-HLH_glcm_DifferenceVariance           |
| wavelet-HLH_glcm_MaximumProbability           |
| wavelet-HLH_glcm_SumEntropy                   |

wavelet-HHL\_firstorder\_Mean  
 wavelet-HHL\_glcml\_Correlation  
 wavelet-HHL\_glcml\_JointEnergy  
 wavelet-HHL\_glcml\_GrayLevelVariance  
 wavelet-HHH\_glcml\_Correlation  
 wavelet-HHH\_glcml\_MaximumProbability  
 wavelet-LLL\_firstorder\_Maximum  
 wavelet-LLL\_firstorder\_Minimum  
 wavelet-LLL\_gldm\_HighGrayLevelEmphasis  
 wavelet-LLL\_glcml\_DifferenceVariance

---

Adaboost model (10):

---

**Radiomics features**

---

original\_firstorder\_Energy  
 original\_glcml\_JointEnergy  
 wavelet-HLH\_glcml\_ClusterTendency  
 wavelet-HLH\_glcml\_DifferenceVariance  
 wavelet-HLH\_glcml\_SumEntropy  
 wavelet-HHL\_firstorder\_Mean  
 wavelet-HHL\_glcml\_Correlation  
 wavelet-HHL\_glcml\_JointEnergy  
 wavelet-HHH\_glcml\_MaximumProbability  
 wavelet-LLL\_gldm\_HighGrayLevelEmphasis

---

**Table S3. Parameters in the development of the model with support vector machine, and Adaboost.**

|                                                                                                                                                           |
|-----------------------------------------------------------------------------------------------------------------------------------------------------------|
| Key parameters in support vector machine classifier: kernel = “rbf”, degree = 3, gamma = “scale”, tol = 1e-3, cache_size = 200. Others used as default.   |
| Key parameters in the Adaboost classifier: n_estimators = 50, learning_rate = 1.0, algorithm = “SAMME.R”, base_estimators = None. Others used as default. |

**Table S4. Formula of the logistic regression radiomics model**

---

$$\begin{aligned} Y = & 0.261 \\ & -0.465 * \text{original\_firstorder\_Energy} + \\ & 0.662 * \text{original\_firstorder\_Mean} + \\ & 0.081 * \text{original\_glszm\_SmallAreaHighGrayLevelEmphasis} + \\ & 0.069 * \text{original\_gldm\_GrayLevelNonUniformity} \\ & -0.408 * \text{original\_glcm\_JointEnergy} + \\ & 0.224 * \text{wavelet-HLL\_firstorder\_Kurtosis} + \\ & 0.567 * \text{wavelet-HLL\_glrlm\_GrayLevelVariance} \\ & -0.095 * \text{wavelet-HLH\_glcm\_ClusterTendency} + \\ & 0.089 * \text{wavelet-HLH\_glcm\_Correlation} \\ & -0.212 * \text{wavelet-HLH\_glcm\_DifferenceVariance} \\ & -0.274 * \text{wavelet-HLH\_glcm\_MaximumProbability} \\ & -0.151 * \text{wavelet-HLH\_glcm\_SumEntropy} \\ & -0.556 * \text{wavelet-HHL\_firstorder\_Mean} \\ & -0.217 * \text{wavelet-HHL\_glcm\_Correlation} \\ & -0.278 * \text{wavelet-HHL\_glcm\_JointEnergy} \\ & -0.128 * \text{wavelet-HHL\_glrlm\_GrayLevelVariance} + \\ & 0.151 * \text{wavelet-HHH\_glcm\_Correlation} + \\ & 0.693 * \text{wavelet-HHH\_glcm\_MaximumProbability} + \\ & 0.116 * \text{wavelet-LLL\_firstorder\_Maximum} + \\ & 0.152 * \text{wavelet-LLL\_firstorder\_Minimum} \\ & -0.19 * \text{wavelet-LLL\_gldm\_HighGrayLevelEmphasis} \\ & -0.178 * \text{wavelet-LLL\_glcm\_DifferenceVariance} \end{aligned}$$

---
